# Supplementary material
Source: MDPI journal article supplement (https://www.mdpi.com/2227-9040/10/8/314)
Supplement: s1 [file s1]

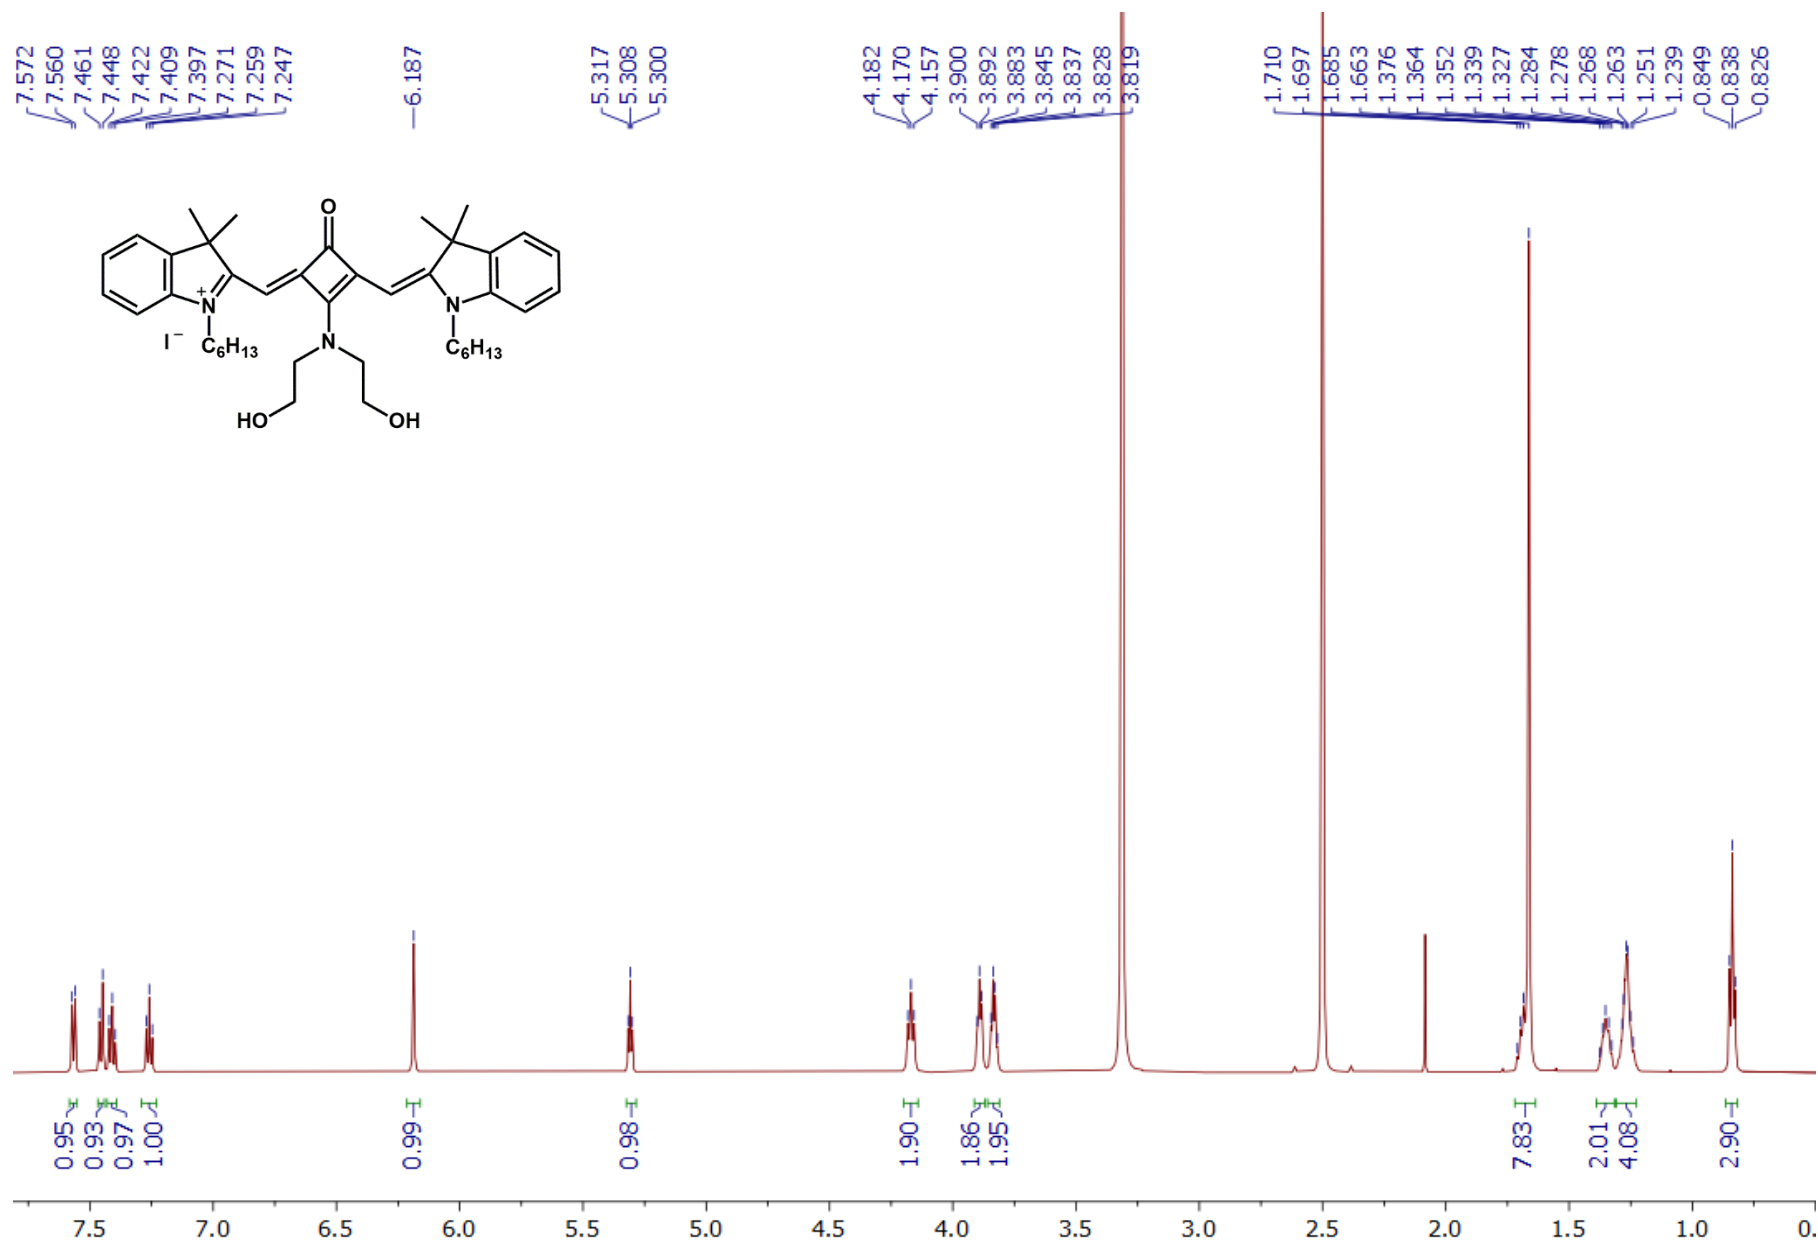

**Figure S1.**  $^1\text{H}$  NMR spectrum of squaraine dye 11a (600 MHz,  $\text{DMSO}-d_6$ , ppm).

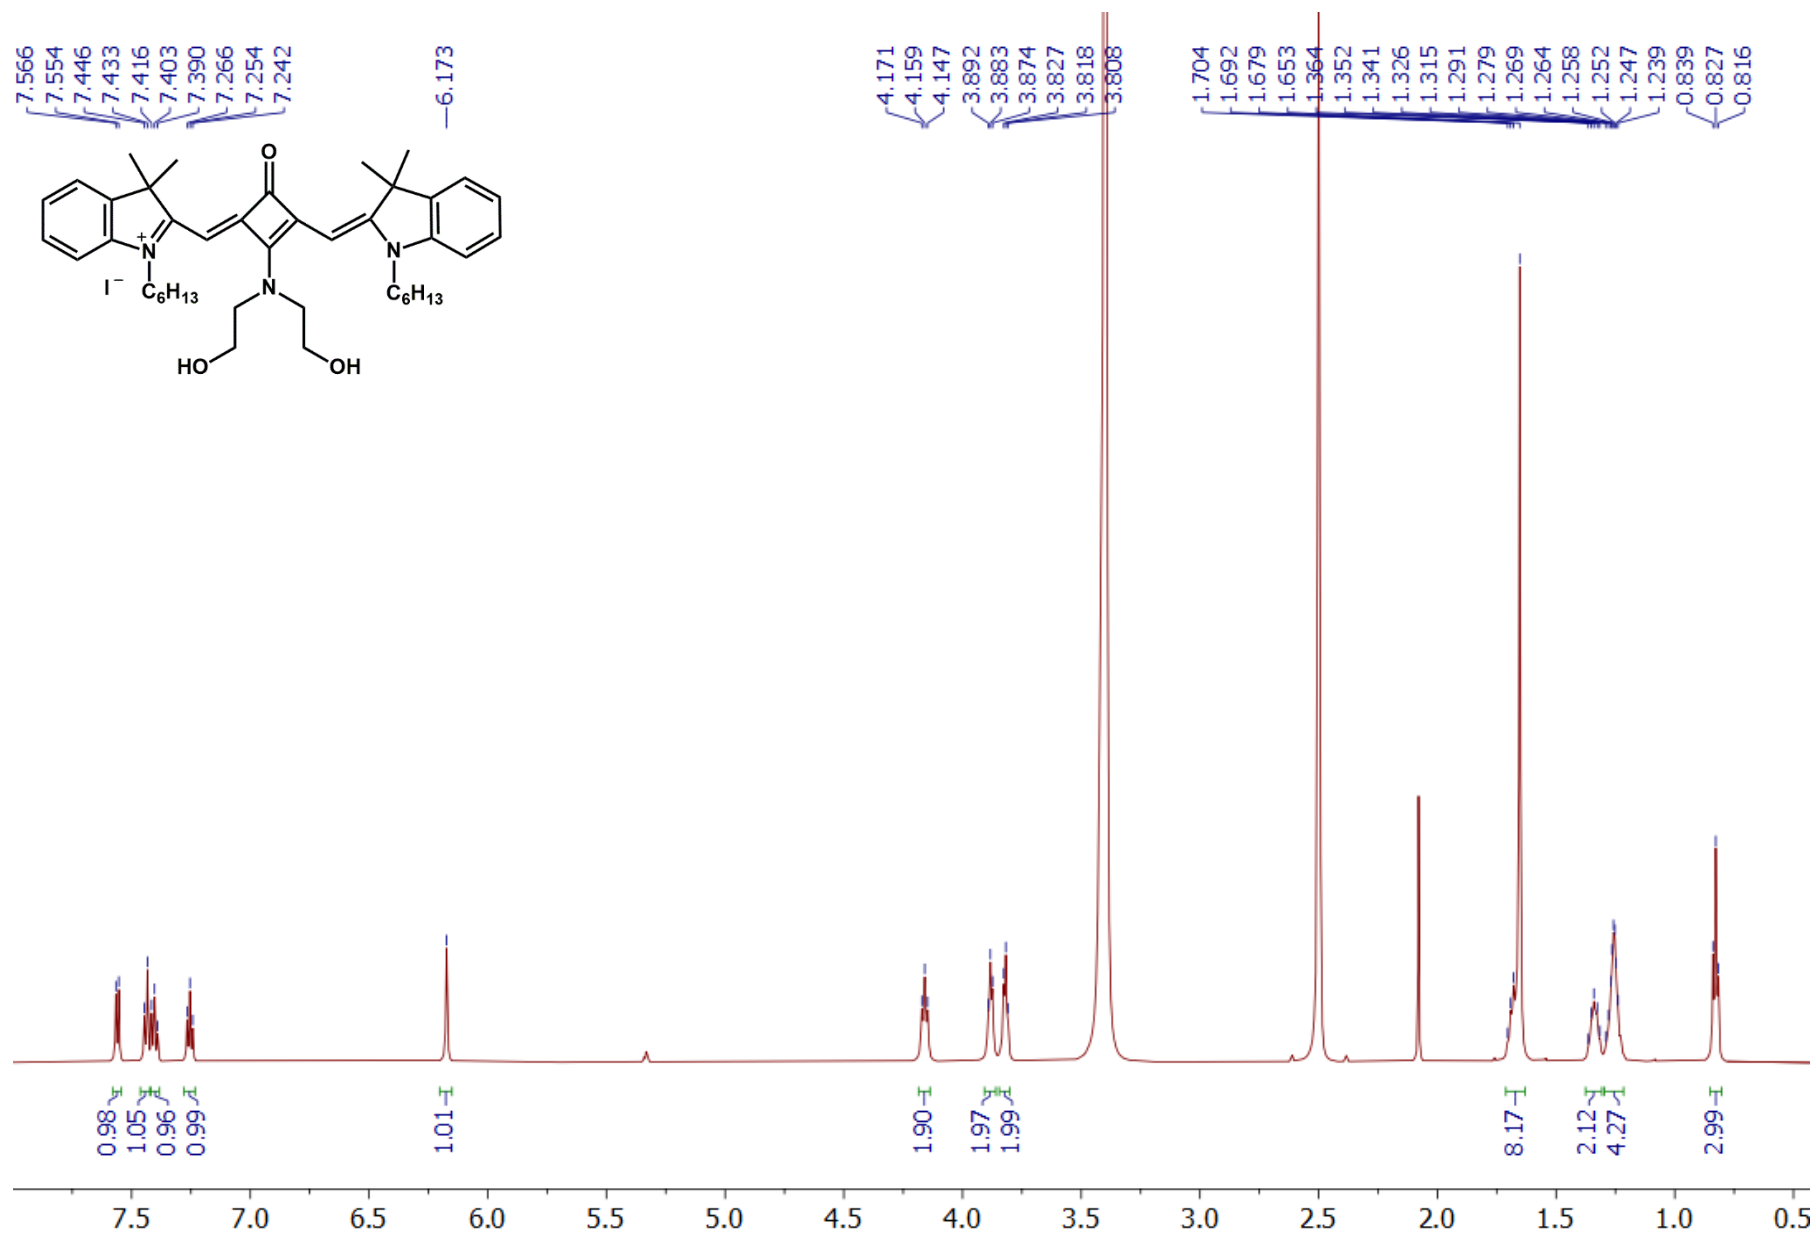

**Figure S2.**  $^1\text{H}$  NMR spectrum of squaraine dye **11a** (600 MHz,  $\text{DMSO}-d_6+\text{D}_2\text{O}$  ppm).

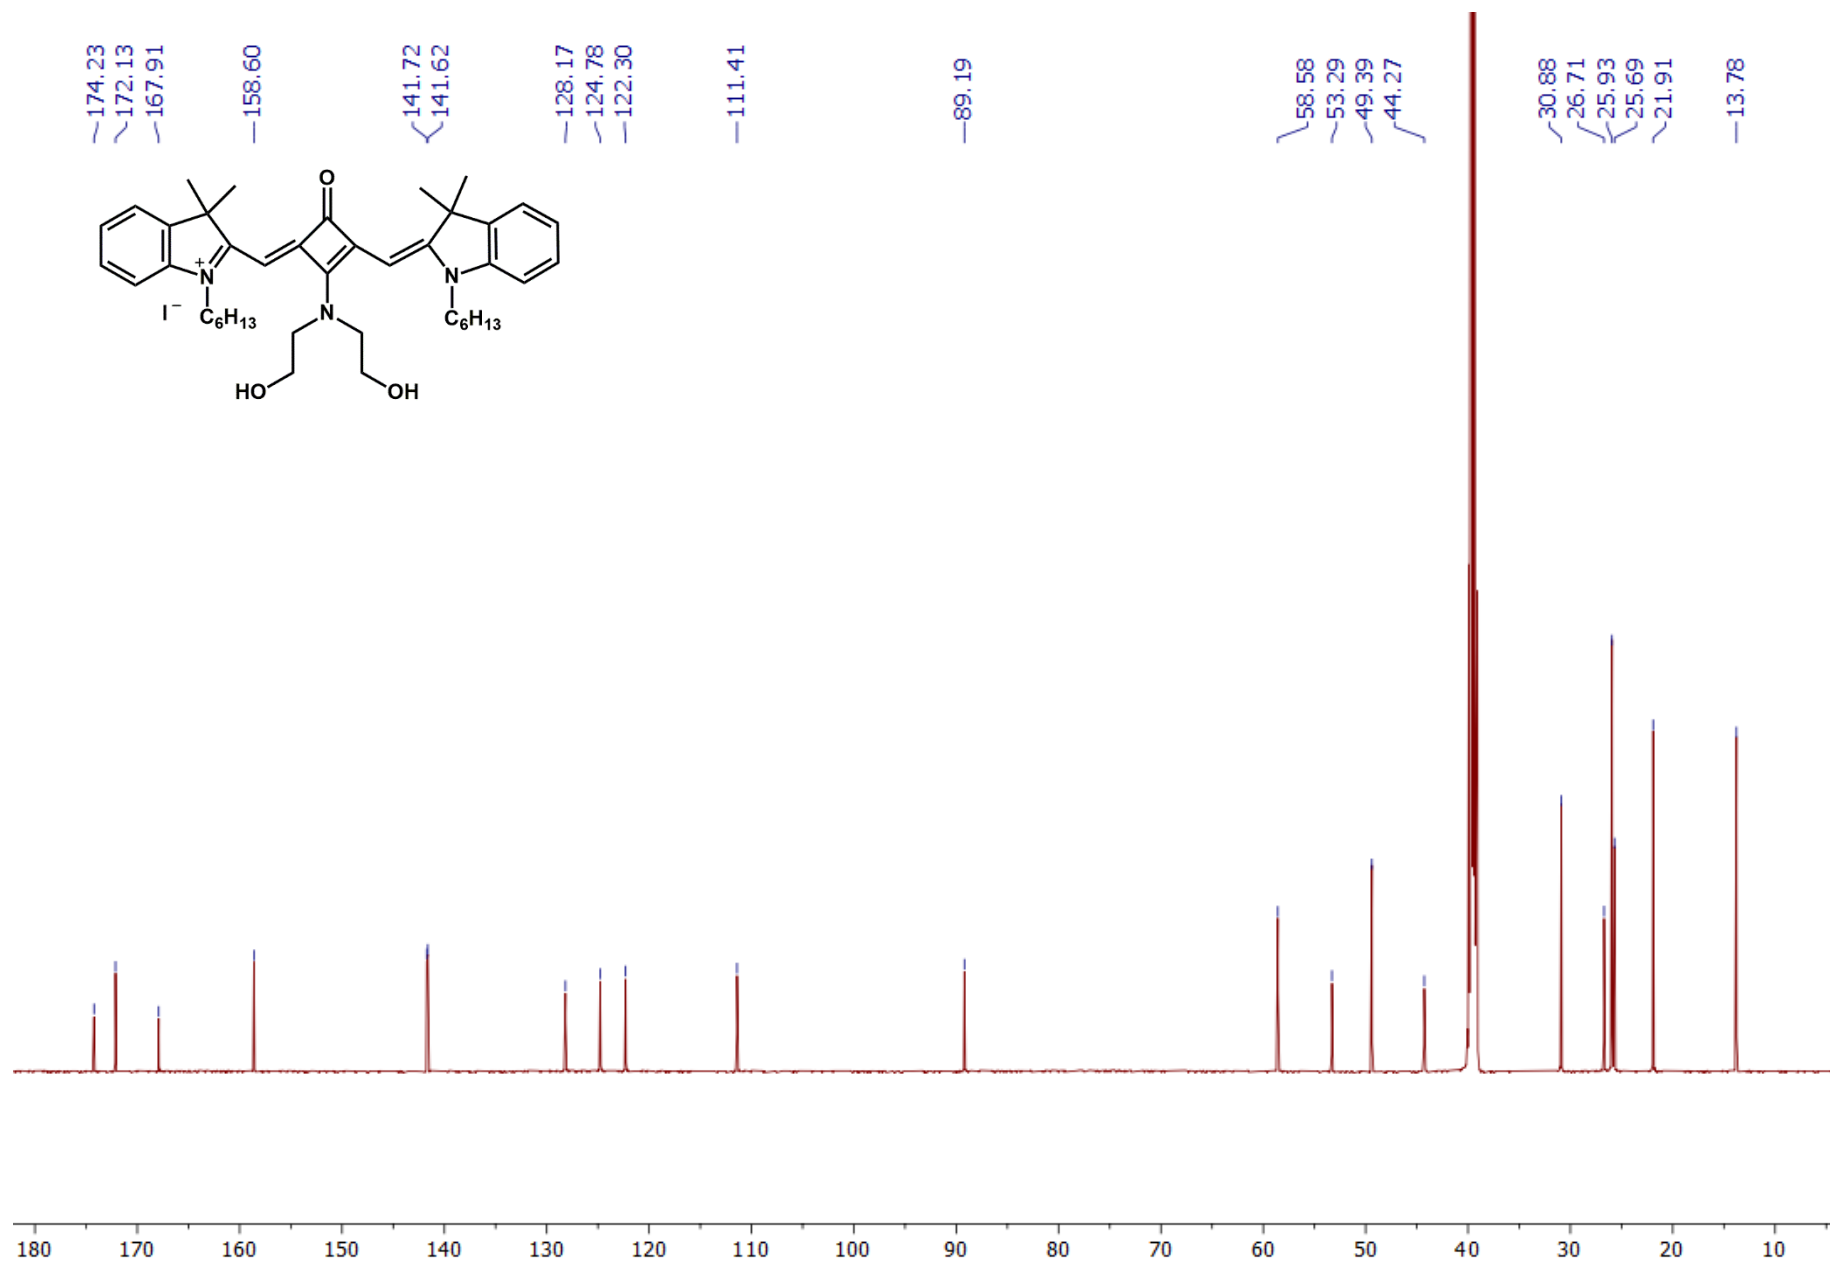

**Figure S3.** <sup>13</sup>C NMR spectrum of squaraine dye **11a** (150.90 MHz, DMSO-*d*<sub>6</sub>, ppm).

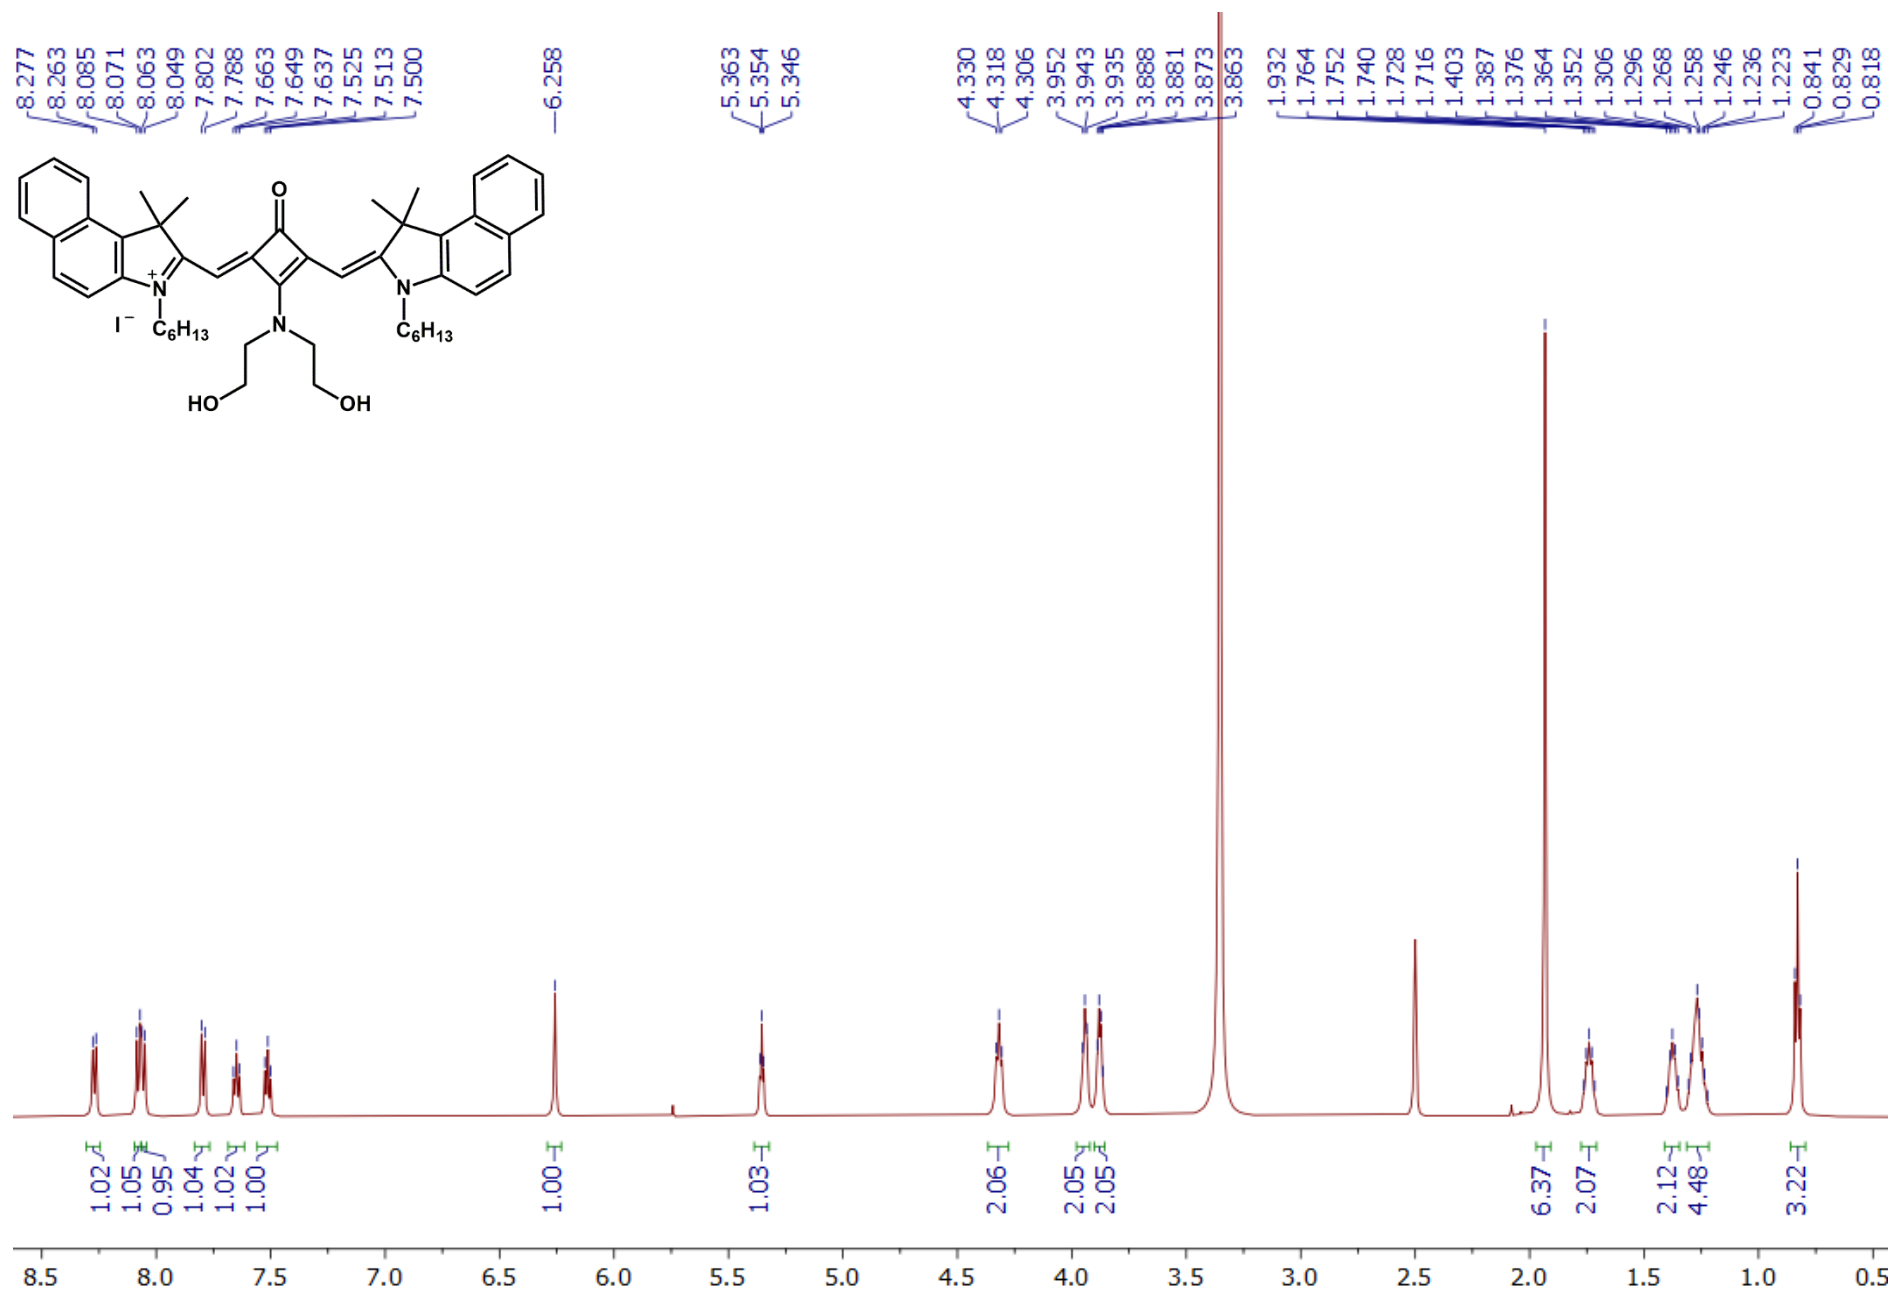

Figure S4.  $^1\text{H}$  NMR spectrum of squaraine dye **11b** (600 MHz,  $\text{DMSO}-d_6$ , ppm).



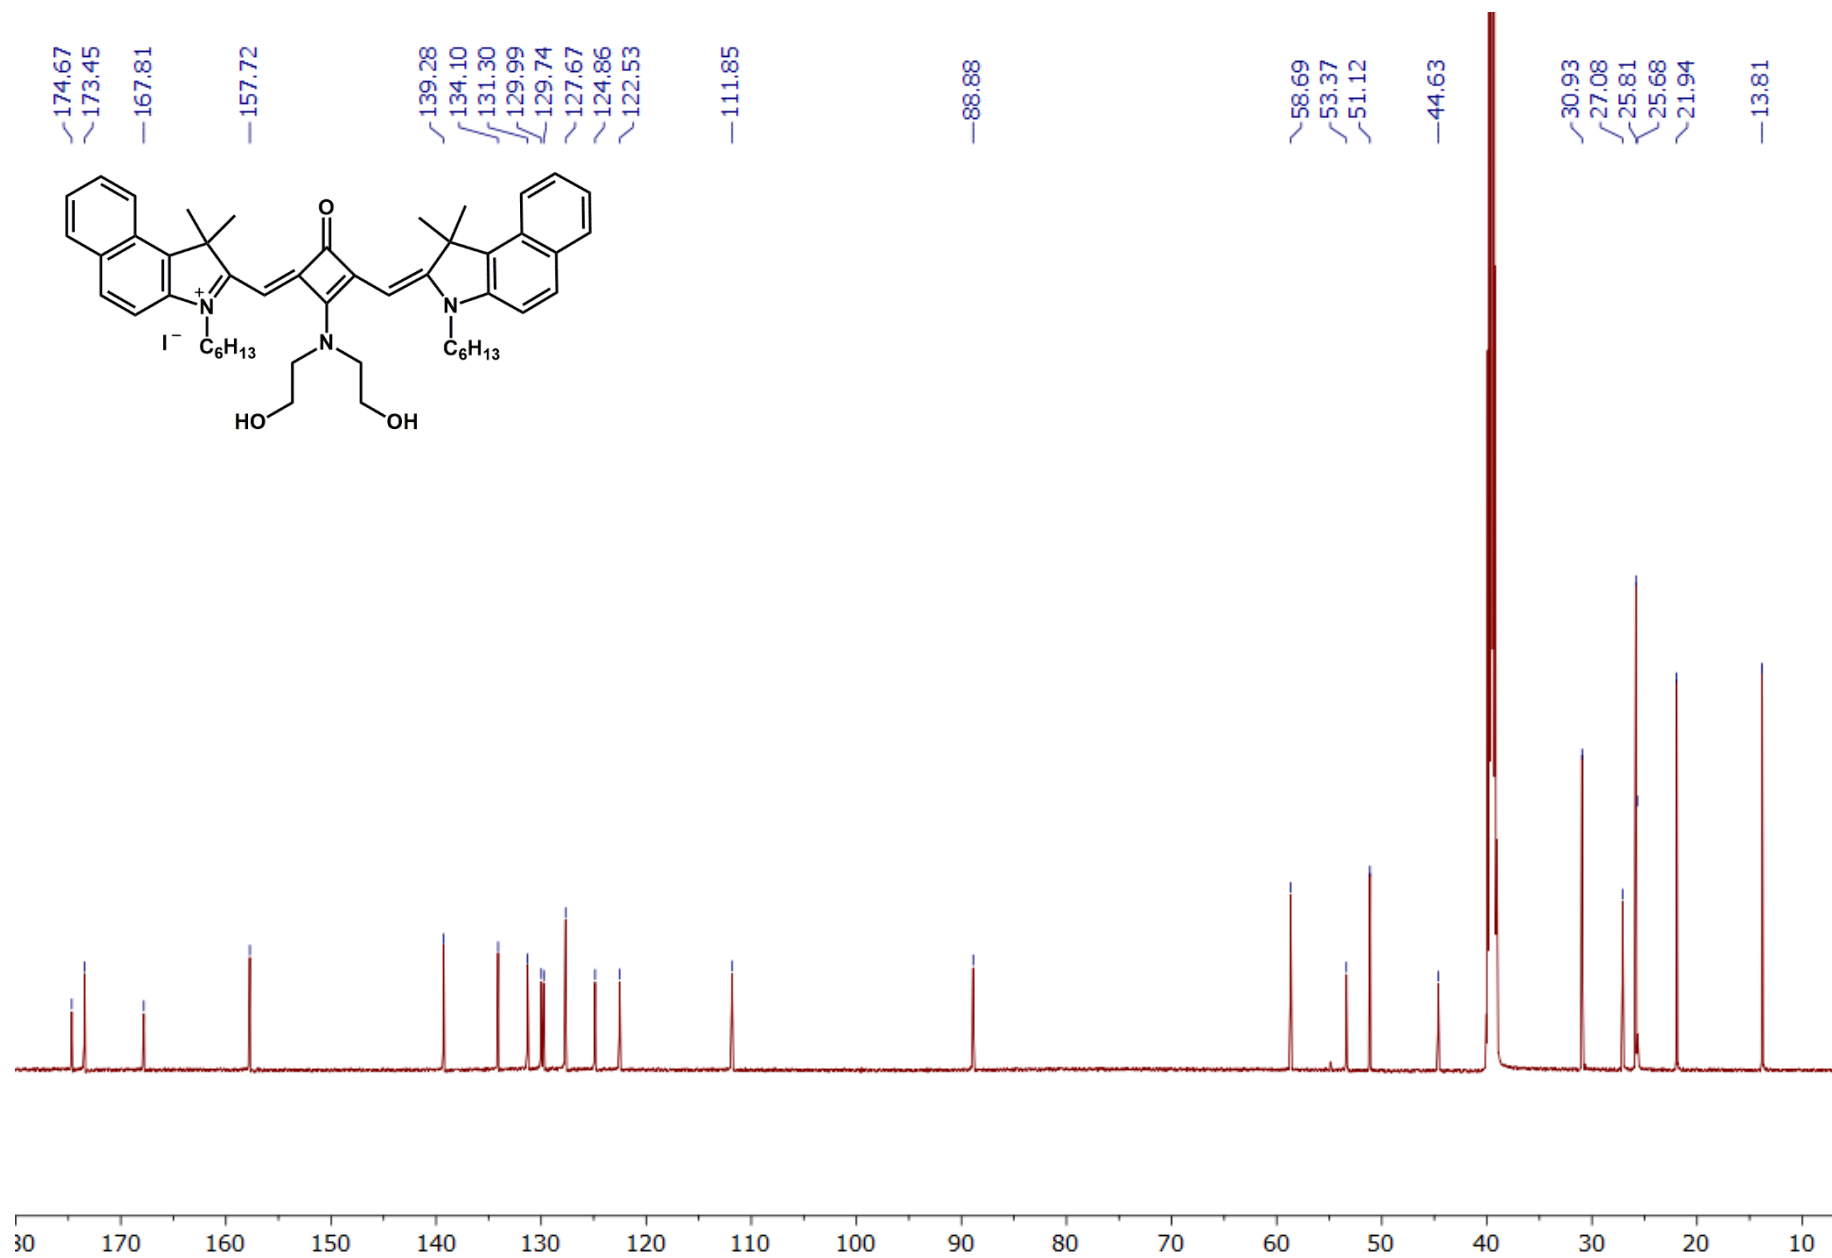

**Figure S6.**  $^{13}\text{C}$  NMR spectrum of squaraine dye **11b** (150.0 MHz,  $\text{DMSO}-d_6$ , ppm).

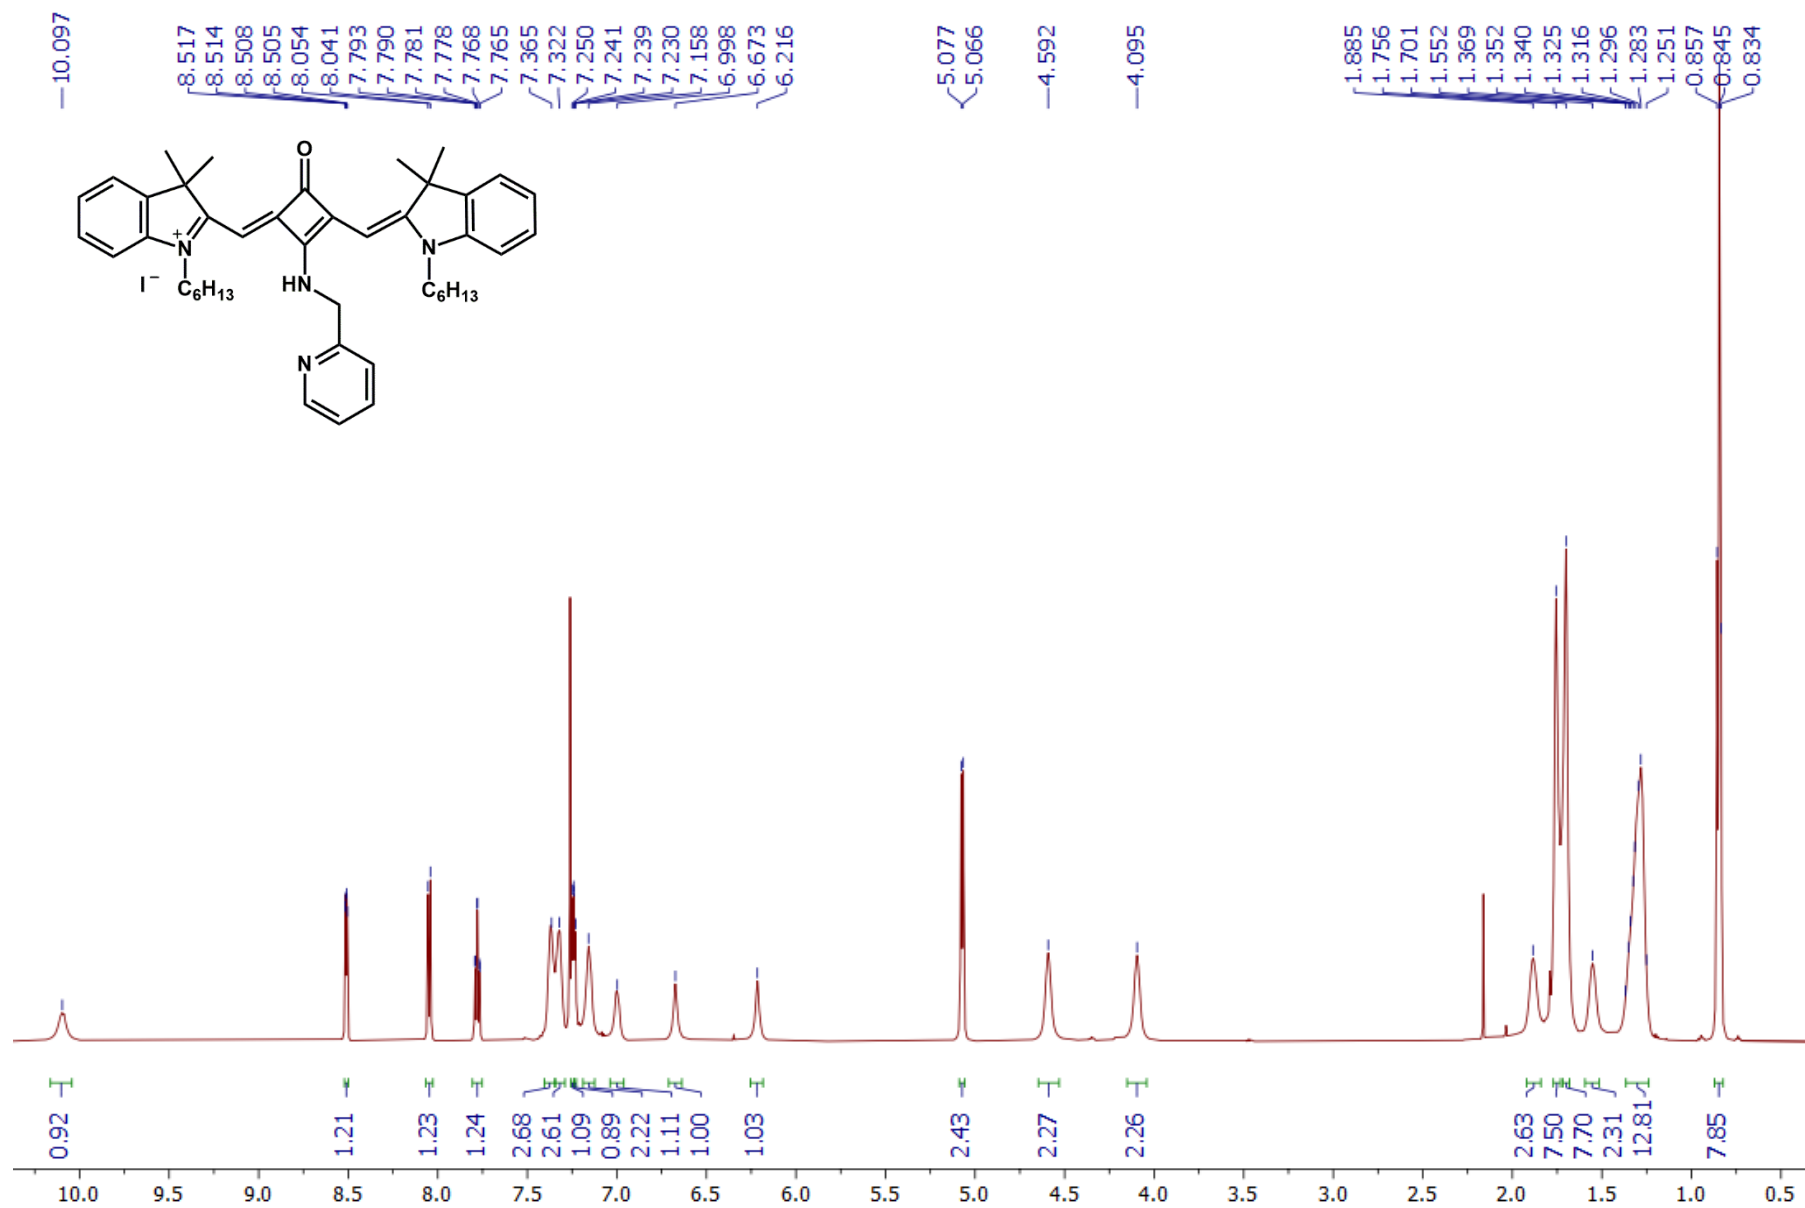

**Figure S7.**  $^1\text{H}$  NMR spectrum of squaraine dye **12a** (600 MHz,  $\text{CDCl}_3$ , ppm).

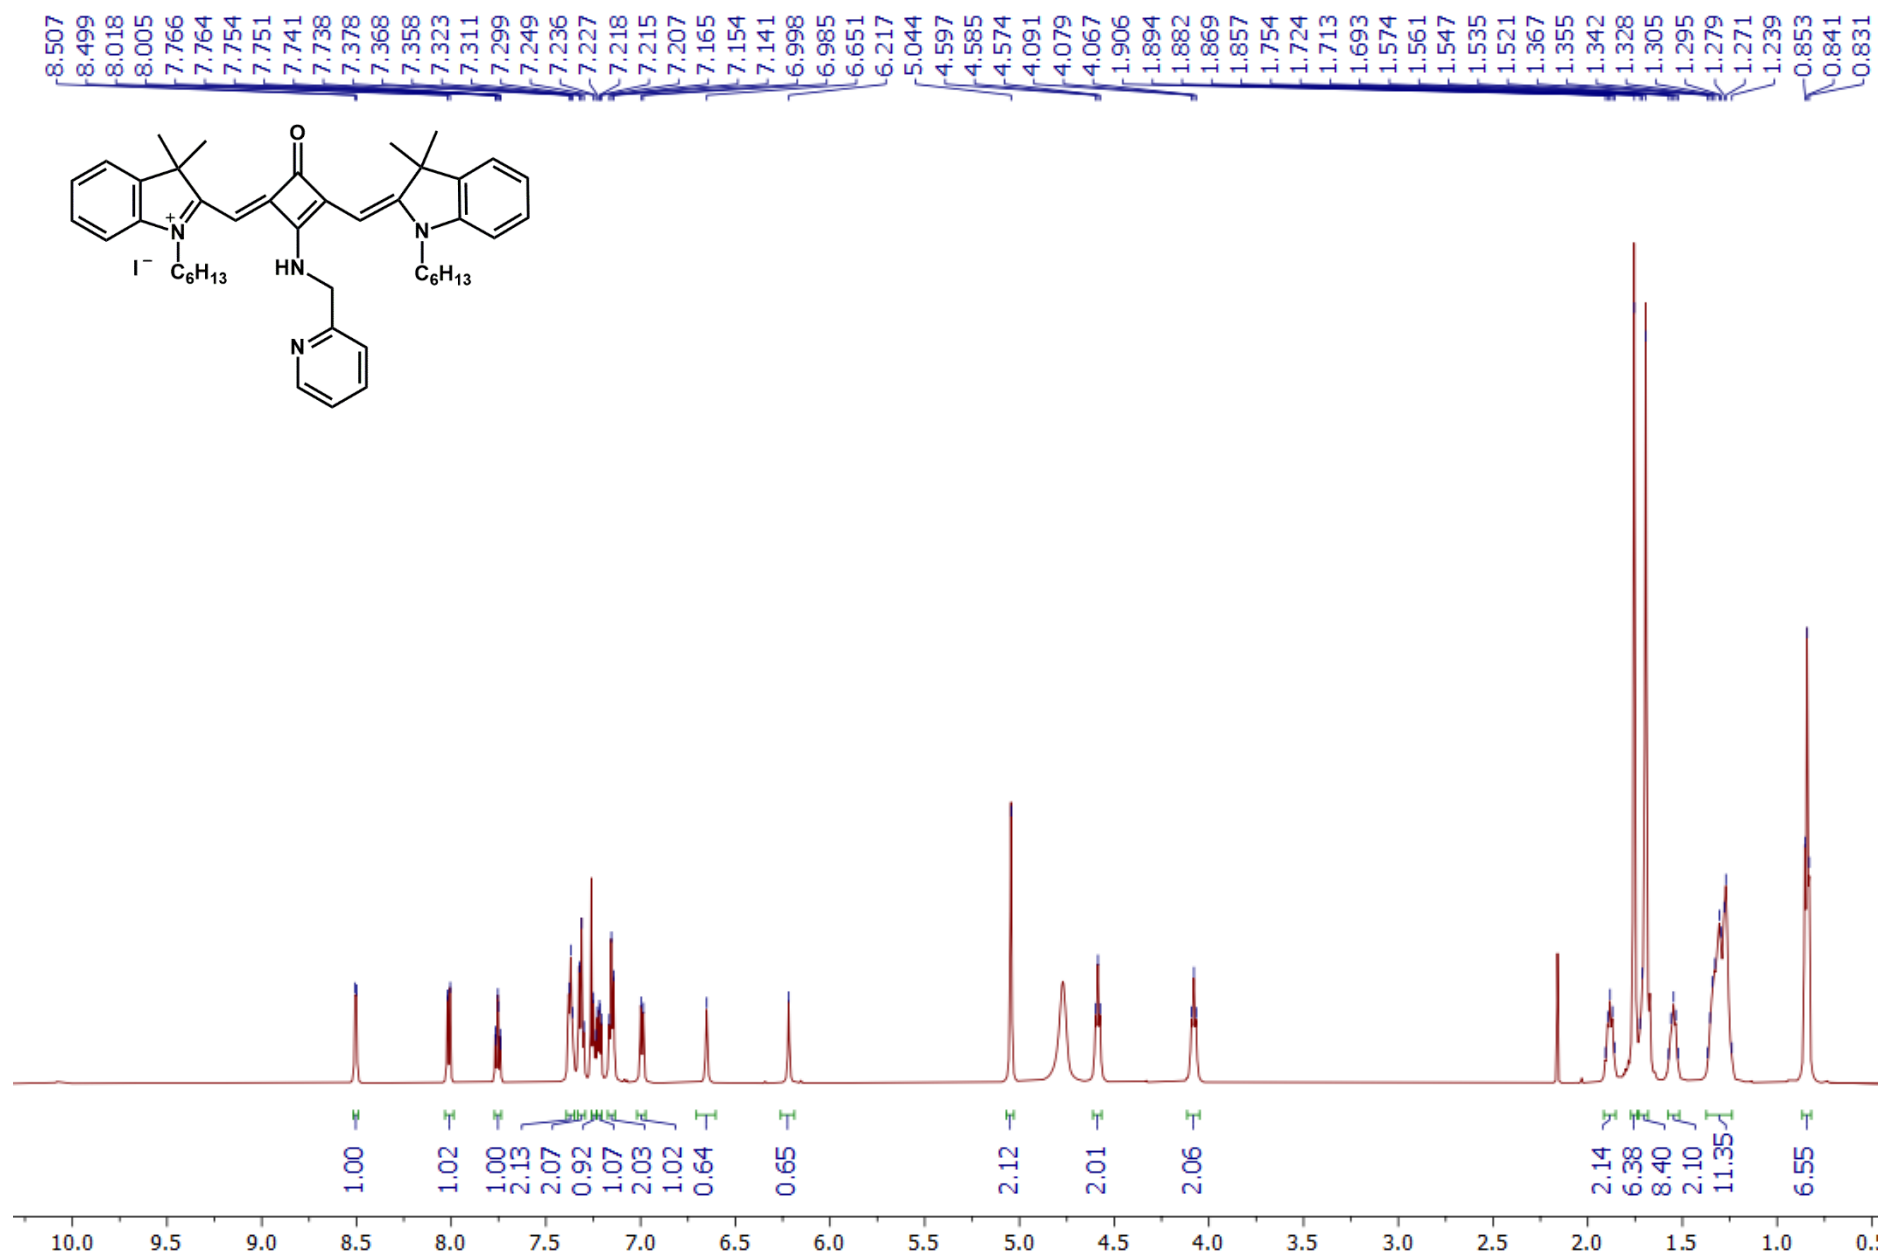

**Figure S8.** <sup>1</sup>H NMR spectrum of squaraine dye **12a** (600 MHz, CDCl<sub>3</sub>+D<sub>2</sub>O, ppm).



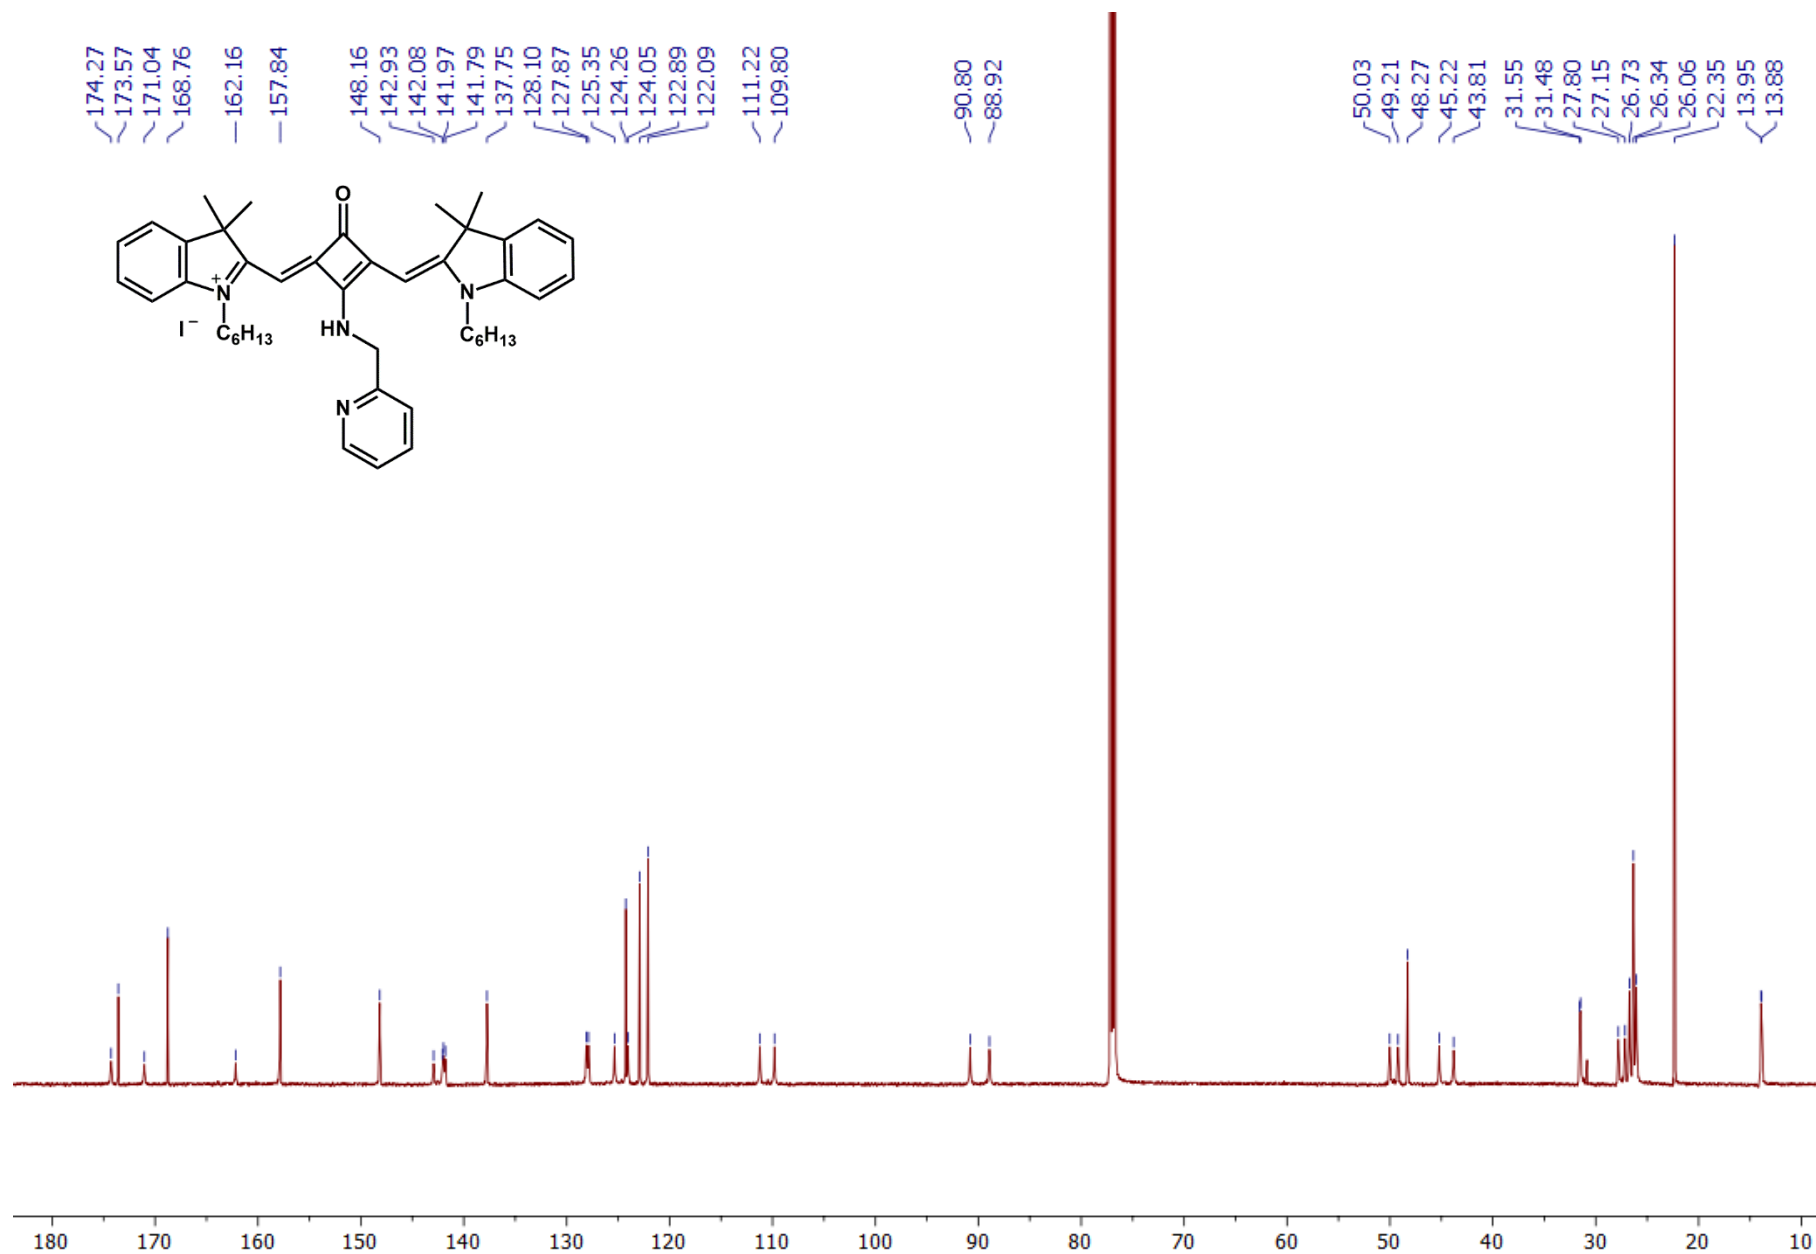

**Figure S9.**  $^{13}\text{C}$  NMR spectrum of squaraine dye **12a** (150.0 MHz,  $\text{CDCl}_3$ , ppm).

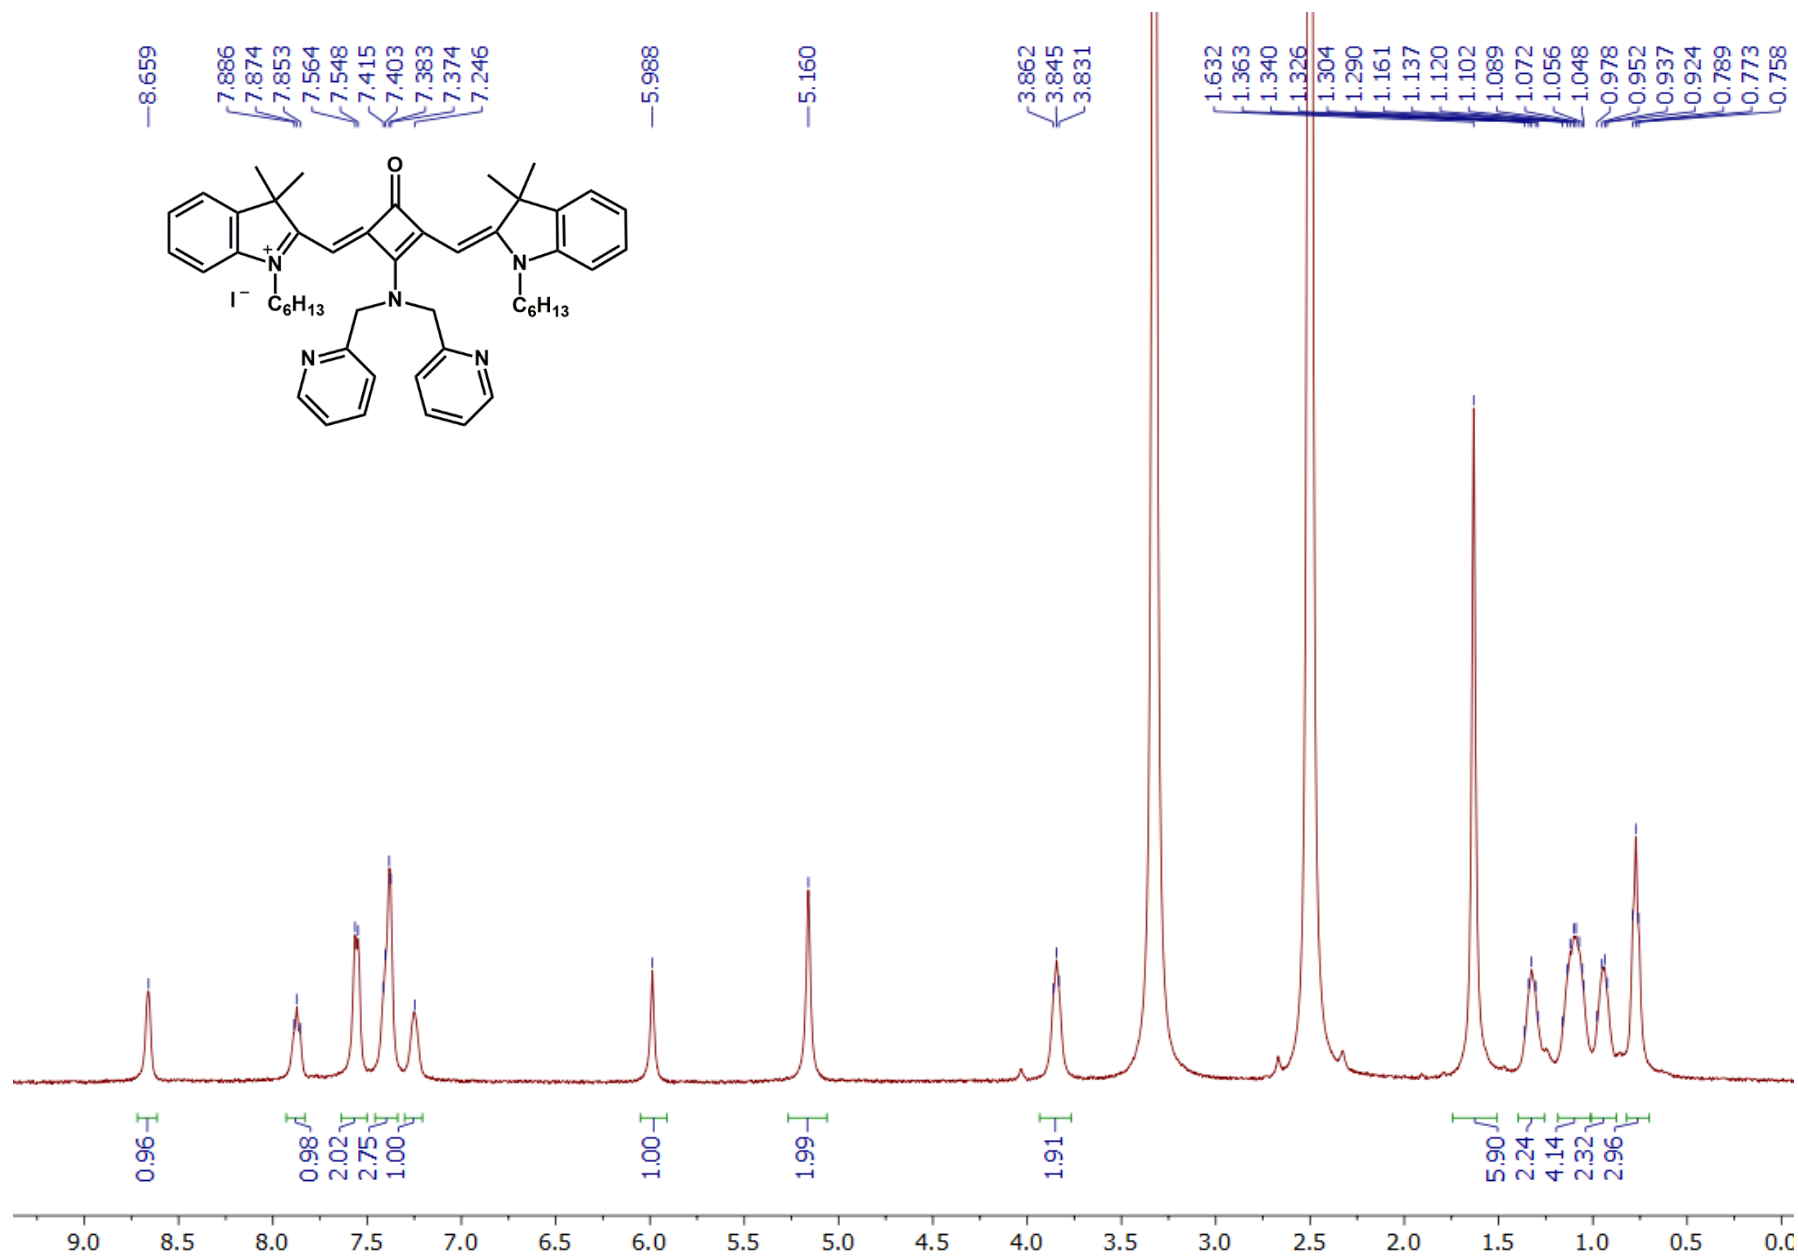

**Figure S10.** <sup>1</sup>H NMR spectrum of squaraine dye 13a (400 MHz, DMSO-*d*<sub>6</sub>, ppm).

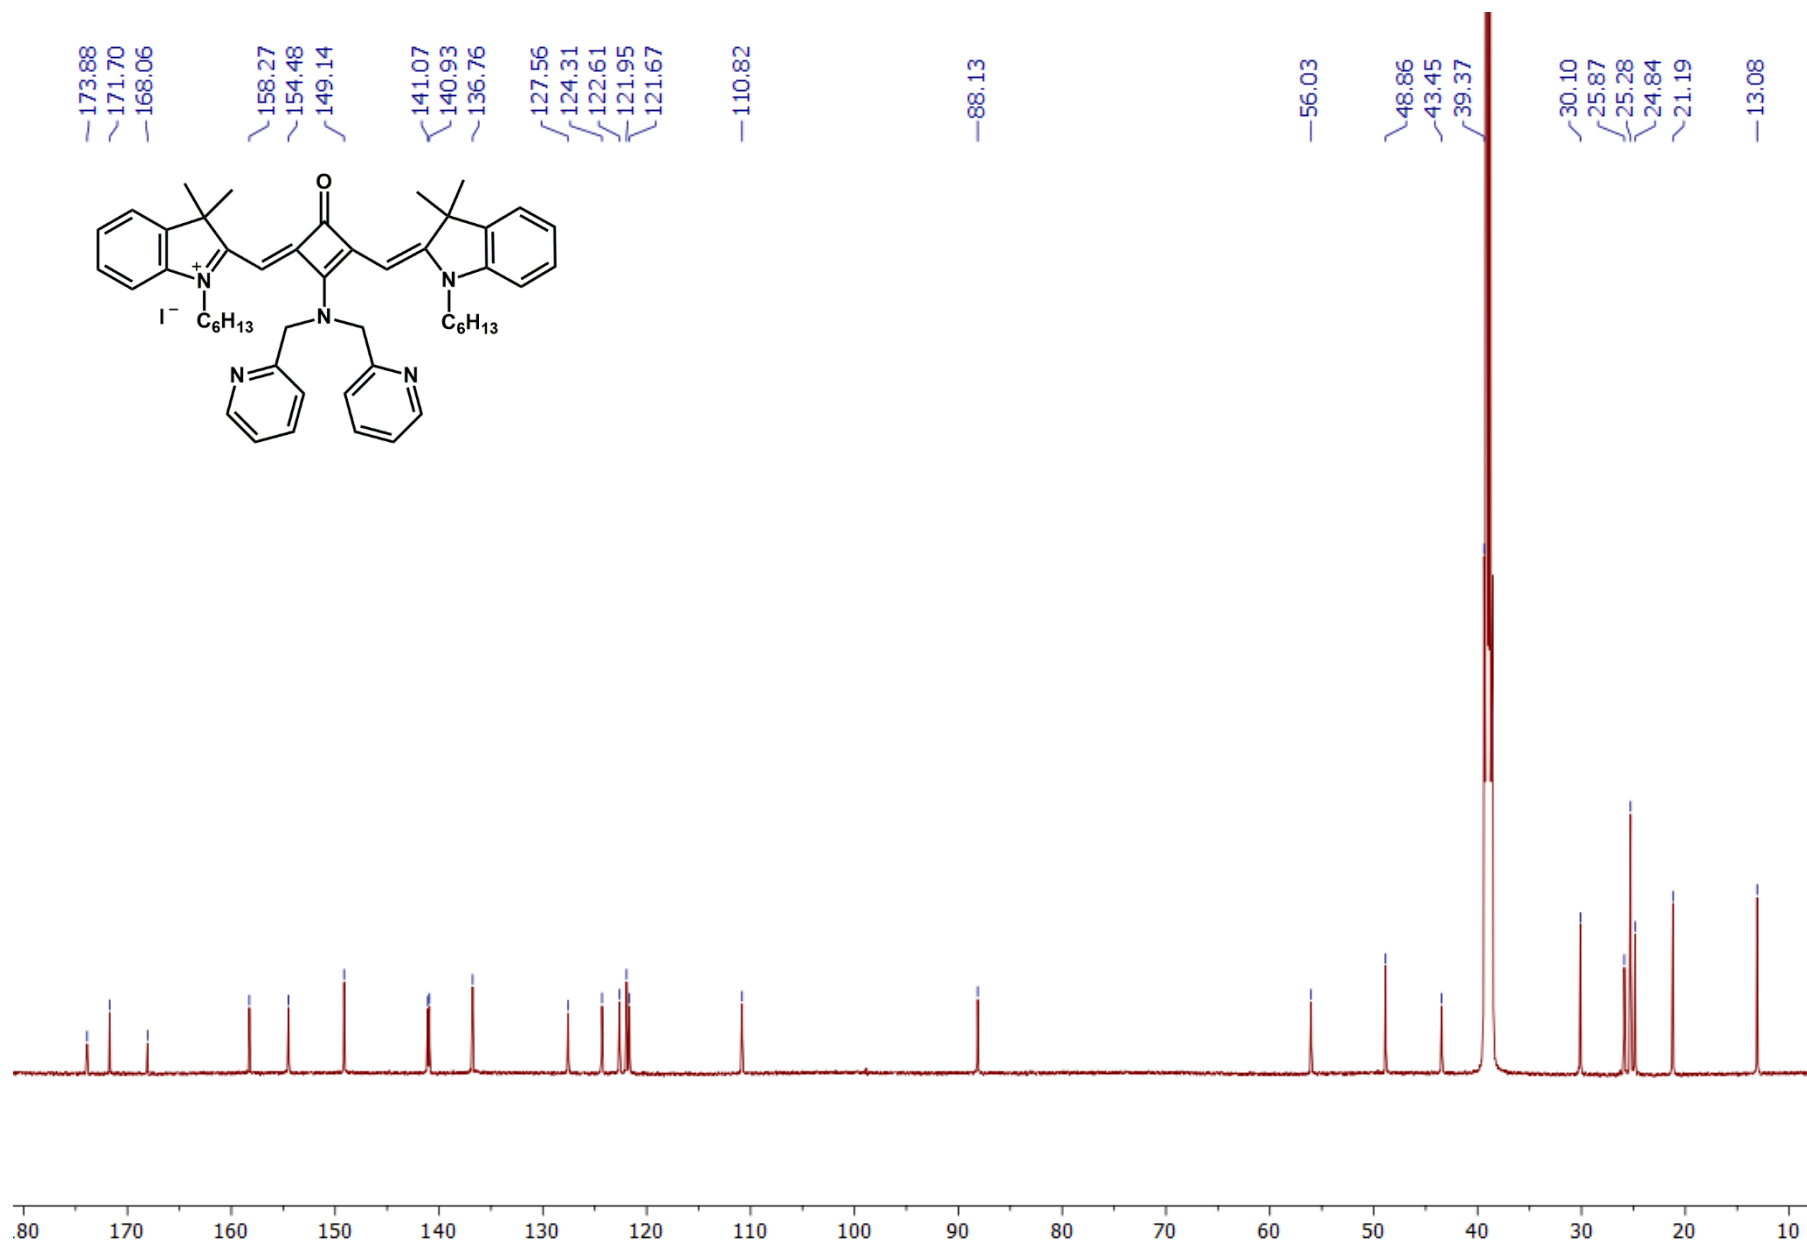

**Figure S11.**  $^{13}\text{C}$  NMR spectrum of squaraine dye **13a** (150.0 MHz,  $\text{DMSO}-d_6$ , ppm).

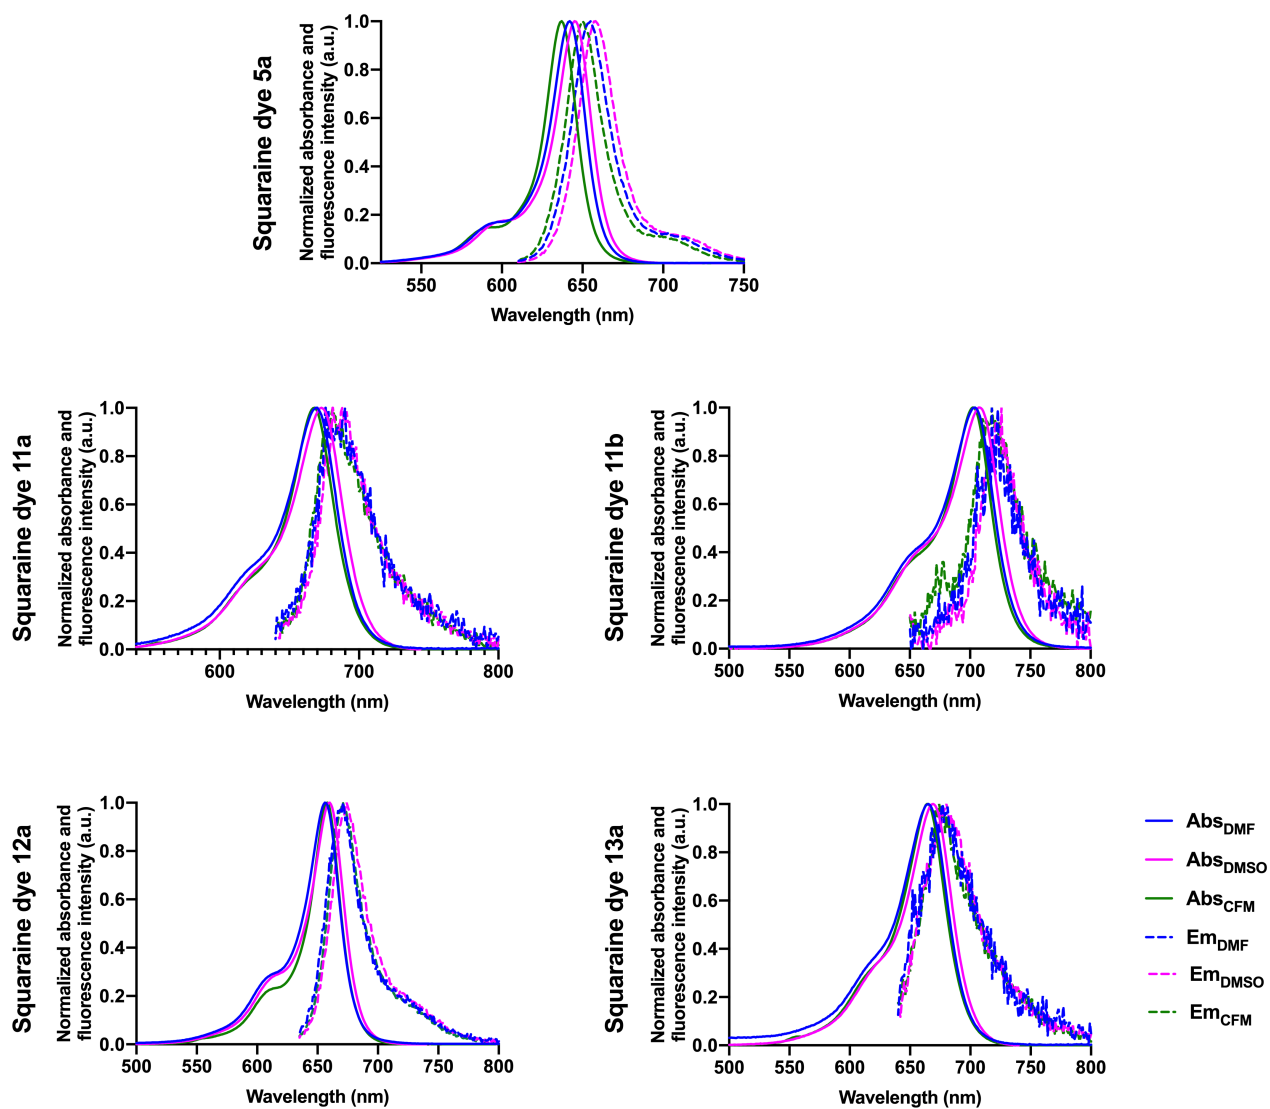

**Figure S12.** Visible absorption (Abs) and emission (Em) spectra of squaraine dyes **5a**, **11a,b**, **12a**, and **13a** obtained in dimethylformamide (DMF), dimethyl sulfoxide (DMSO) and chloroform (CFM). Absorbance and fluorescence intensity were normalized to 1.0 for more straightforward analysis and are presented as arbitrary units (a.u.).

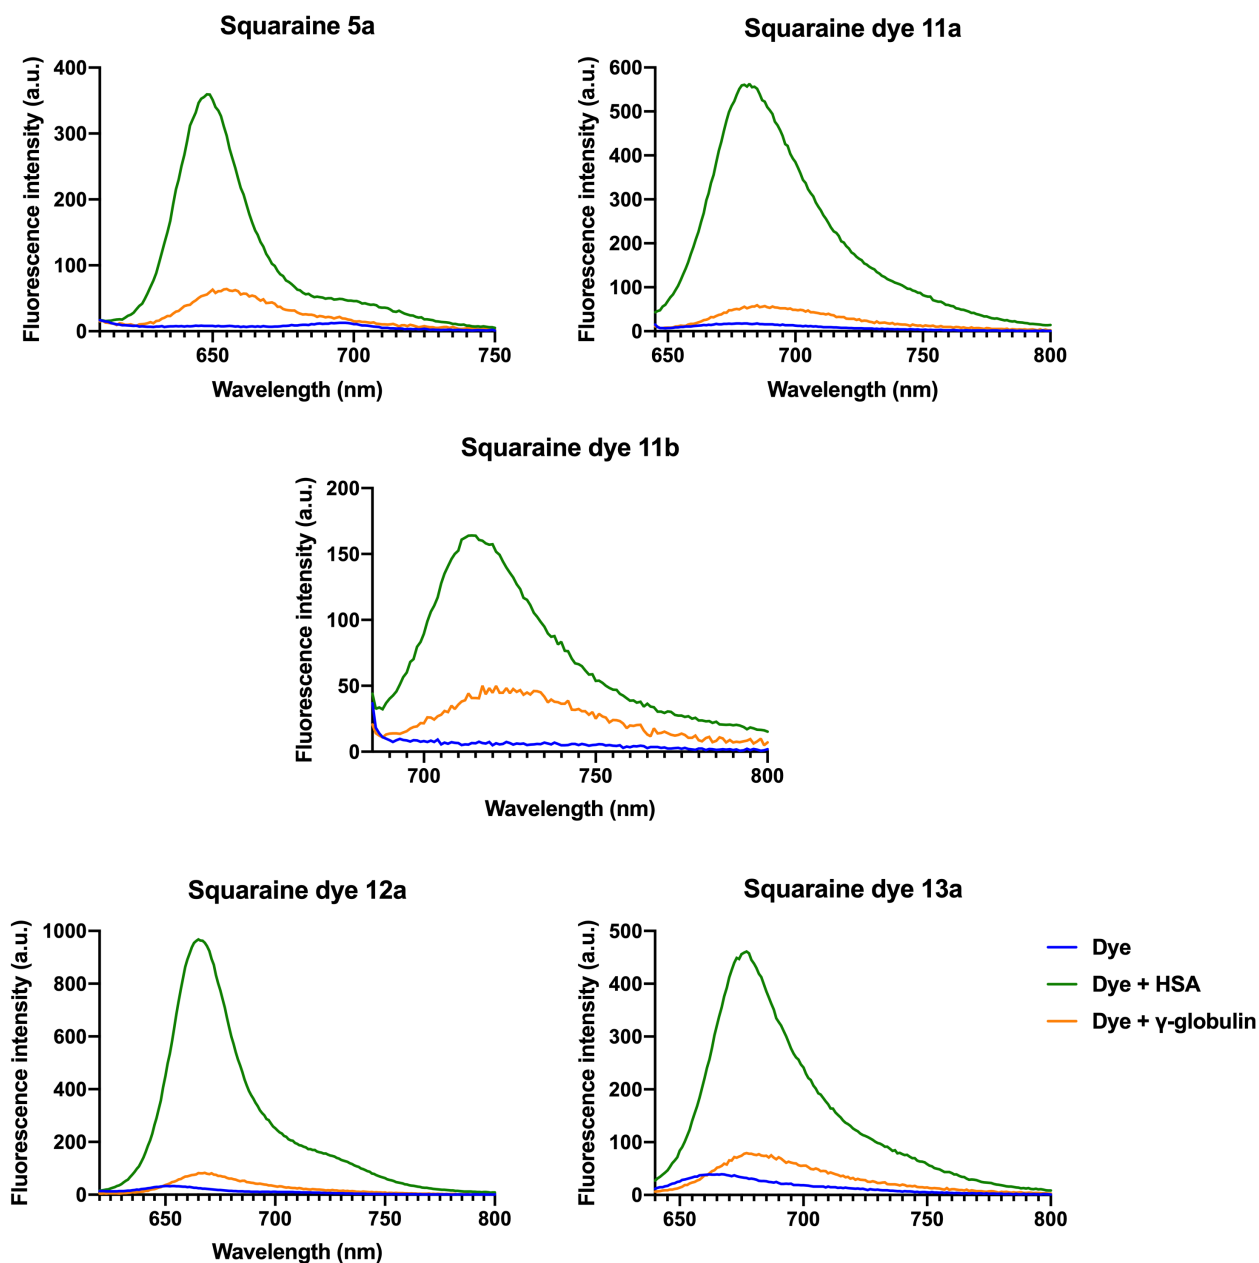

**Figure S13.** Fluorescence spectra of squaraine dyes **5a**, **11a,b**, **12a**, and **13a** in phosphate buffer pH 7.4 at a concentration of 2.0  $\mu$ M in the presence and absence of human  $\gamma$ -globulin and serum albumin proteins and at a concentration of 3.0  $\mu$ M. Spectra were obtained at the incubation time with the highest albumin-dye interaction and fluorescence intensity is presented as arbitrary units (a.u.).

**Table S1.** Estimated free binding energy and interactions list of warfarin and squaraine dyes **5a**, **11a,b**, **12a**, and **13a** in Sudlow site I of human serum albumin.

| Protein: 2BXD<br>(Sudlow's Site I)          |                                  | Ligand   |        |                     |        |        |        |        |
|---------------------------------------------|----------------------------------|----------|--------|---------------------|--------|--------|--------|--------|
|                                             |                                  | Warfarin | 5a     | 11a                 | 11b    | 12a    | 13a    |        |
| Estimated Free Binding Energy<br>(Kcal/mol) |                                  | -8.80    | -12.08 | -11.07              | -12.15 | -13.12 | -12.34 |        |
| Interactions                                | Classic H-Bonds                  | TYR150   |        | LYS195              | LYS195 |        |        |        |
|                                             |                                  | HIS242   |        | LYS199              | ARG222 | ARG218 |        |        |
|                                             |                                  | ARG222   | ---    | ARG218              | ASP451 | ARG222 | ARG222 |        |
|                                             |                                  | ARG257   |        | ARG222              |        |        |        |        |
|                                             | Non-classic H-Bonds <sup>a</sup> | ---      | ARG218 |                     |        |        |        |        |
|                                             |                                  |          | PRO447 | ARG218              | ARG218 | ARG218 | ARG218 |        |
|                                             |                                  | ASP451   |        |                     |        |        |        |        |
|                                             | Van der Waals                    | ---      | ---    | ---                 | ---    | ---    | ---    |        |
|                                             | Electrostatics <sup>b</sup>      | LYS199   | LYS195 |                     |        |        |        | LYS195 |
|                                             |                                  |          | ARG218 | LYS195              | LYS195 | LYS195 |        | ARG218 |
| ARG222                                      | LYS199                           |          | LYS199 | LYS199              |        | ARG222 |        |        |
| ASP451                                      | ARG222                           |          | ARG218 |                     |        | HIS242 |        |        |
|                                             |                                  |          |        |                     |        | GLU292 |        |        |
| Miscellaneous                               | ---                              | ---      | ---    | CYS448 <sup>d</sup> |        | ASP451 |        |        |
| Hydrophobic                                 |                                  |          |        |                     |        |        | LYS195 |        |
|                                             |                                  |          |        |                     |        | ALA194 | TYR150 |        |
|                                             |                                  |          |        |                     |        | LYS195 | LYS195 |        |
|                                             |                                  |          | LYS195 | LYS195              | LYS195 | LEU198 | LEU198 |        |
|                                             | LYS195                           | TRP214   | LYS199 | LYS199              | PHE211 | LYS199 | LYS199 |        |
|                                             | TRP214                           | ALA215   | PHE211 | PHE211              | TRP214 | TRP214 | TRP214 |        |
|                                             | ALA215                           | ARG218   | TRP214 | LEU238              | ALA215 | ARG218 | ARG218 |        |
|                                             | ARG218                           | LEU219   | LEU238 | HIS242              | LEU238 | LEU219 | LEU219 |        |
|                                             | LEU219                           | LEU238   | HIS242 | ALA291              | ALA291 | HIS242 | HIS242 |        |
|                                             | LEU238                           | ALA291   | ALA291 | LYS436              | ALA291 | ALA291 | ALA291 |        |
|                                             |                                  | PRO447   | PRO447 | PRO447              | PRO447 | PRO447 | VAL343 |        |
|                                             |                                  | CYS448   | CYS448 | CYS448              | CYS448 | CYS448 | PRO447 |        |
|                                             |                                  |          |        |                     |        | TYR452 | CYS448 |        |
|                                             |                                  |          |        |                     | VAL455 | VAL455 |        |        |
| Unfavorable <sup>c</sup>                    | ---                              | ARG218   | ---    | LYS195              | ---    | LYS199 |        |        |
|                                             |                                  |          |        | ARG218              |        | ARG222 |        |        |

Kcal/mol = units of Estimated Free Binding Energy, Kilocalorie per mole; <sup>a</sup> Non-classical H-bonds: carbon-hydrogen;  $\pi$ -donor hydrogen bond; <sup>b</sup> Electrostatic interactions:  $\pi$ -cation;  $\pi$ -anion; attractive charge; salt bridge; <sup>c</sup> Unfavorable interactions: charge repulsion; <sup>d</sup>  $\pi$ -Sulfur interactions.

**Table S2.** Estimated free binding energy and interactions list of ibuprofen and squaraine dyes **5a**, **11a,b**, **12a**, and **13a** in Sudlow site II of human serum albumin.

| Protein: 2BXG<br>(Sudlow's Site II)         |                                    | Ligand           |                     |                  |                     |        |        |        |
|---------------------------------------------|------------------------------------|------------------|---------------------|------------------|---------------------|--------|--------|--------|
|                                             |                                    | Ibuprofen        | 5a                  | 11a              | 11b                 | 12a    | 13a    |        |
| Estimated free binding energy<br>(Kcal/mol) |                                    | -7.42            | -8.36               | -8.83            | -10.21              | -8.87  | -9.41  |        |
| Interactions                                | Classical H-Bonds                  | ARG410<br>TYR411 | ---                 | LYS351<br>ASN483 | ARG349              | ASN483 | ---    |        |
|                                             | Non-Classical H-Bonds <sup>a</sup> | ---              | ARG348              | ASN483           | LYS351<br>ASN483    | ---    | SER480 |        |
|                                             | Van der Waals                      | ---              | ---                 | ---              | ---                 | ---    | ---    |        |
|                                             | Electrostatics <sup>b</sup>        | ---              | ---                 | ---              | GLU479              | ---    | ---    |        |
|                                             | Miscellaneous                      | ---              | THR352 <sup>e</sup> | ---              | CYS487 <sup>d</sup> | ---    | ---    |        |
|                                             | Hydrophobic                        | ILE388           |                     |                  |                     |        | ARG348 | ARG348 |
|                                             |                                    | CYS392           |                     |                  |                     |        | LYS351 | LYS351 |
|                                             |                                    | LEU407           | ARG348              | PRO379           | THR352              | PRO379 | THR352 |        |
|                                             |                                    | LEU430           | LYS351              | LEU380           | GLU376              | LEU380 | LEU380 |        |
|                                             |                                    | VAL433           | PRO379              | PRO486           | LEU380              | CYS476 | ARG484 |        |
|                                             |                                    | CYS437           | LEU380              | CYS487           | CYS487              | PRO486 | PRO486 |        |
|                                             |                                    | CYS438           | PRO486              | ALA490           | ALA490              | CYS487 | CYS487 |        |
|                                             |                                    | ALA449           | CYS487              |                  |                     | ALA490 | ALA490 |        |
| LEU453                                      |                                    | ALA490           |                     |                  |                     |        |        |        |
| Unfavorable <sup>c</sup>                    |                                    | ---              | ---                 | ---              | ---                 | ---    |        |        |

Kcal/mol = units of Estimated Free Binding Energy, Kilocallorie per mole; <sup>a</sup> Non-classical H-bonds: carbon-hydrogen;  $\pi$ -donor hydrogen bond; <sup>b</sup> Electrostatic interactions:  $\pi$ -cation;  $\pi$ -anion; attractive charge; salt bridge; <sup>c</sup> Unfavorable interactions: charge repulsion; <sup>d</sup>  $\pi$ -Sulfur interactions; <sup>e</sup>  $\pi$ -Lone-pair interactions.

**Table S3:** Estimated free binding energy and interactions of squaraine dyes **5a**, **11a,b**, **12a**, and **13a** in human serum albumin.

| Protein: 2BXG<br>(All Protein)              | Ligand                     |                  |                  |                  |                     |
|---------------------------------------------|----------------------------|------------------|------------------|------------------|---------------------|
|                                             | 5a                         | 11a              | 11b              | 12a              | 13a                 |
| Estimated free binding energy<br>(Kcal/mol) | -9.09                      | -6.84            | -9.67            | -8.66            | -9.25               |
| Classical<br>H-Bonds                        | ---                        | ASN109<br>GLU425 | LEU115           | LYS106           | ---                 |
| Non-Classical<br>H-Bonds <sup>a</sup>       | LEU115<br>TYR138<br>GLU141 | ---              | ARG145           | HYS105<br>ASP107 | ---                 |
| Van der Waals                               | ---                        | ---              | ---              | ---              | ---                 |
| Electrostatics <sup>b</sup>                 | ARG117                     | GLU425           | ARG186<br>GLU425 | ASP107           | GLU141<br>ARG144    |
| Miscellaneous                               | ---                        | ---              | ---              | ---              | MET123 <sup>d</sup> |
| Interactions                                | LEU115                     |                  |                  |                  |                     |
|                                             | PRO118                     |                  | PRO110           |                  | PHE36               |
|                                             | MET123                     | PRO110           | ILE142           | MET87            | PRO118              |
|                                             | PHE134                     | PRO421           | ARG145           | HYS105           | VAL122              |
|                                             | LYS137                     | VAL424           | TYR161           | LYS106           | ALA126              |
|                                             | ILE142                     | LEU463           | LEU182           | PRO110           | PHE134              |
|                                             | TYR161                     | ILE563           | ARG186           | LEU112           | LYS137              |
|                                             | LEU182                     |                  | LYS190           | LYS466           | TYR140              |
|                                             | ARG186                     |                  |                  |                  |                     |
|                                             | Unfavorable <sup>c</sup>   | ARG117           | ---              | ---              | ASP108              |

Kcal/mol = units of Estimated Free Binding Energy, Kilocalorie per mole; <sup>a</sup> Non-classical H-bonds: carbon-hydrogen;  $\pi$ -donor hydrogen bond; <sup>b</sup> Electrostatic interactions:  $\pi$ -cation;  $\pi$ -anion; attractive charge; salt bridge; <sup>c</sup> Unfavorable interactions: charge repulsion; <sup>d</sup>  $\pi$ -Sulfur interactions.



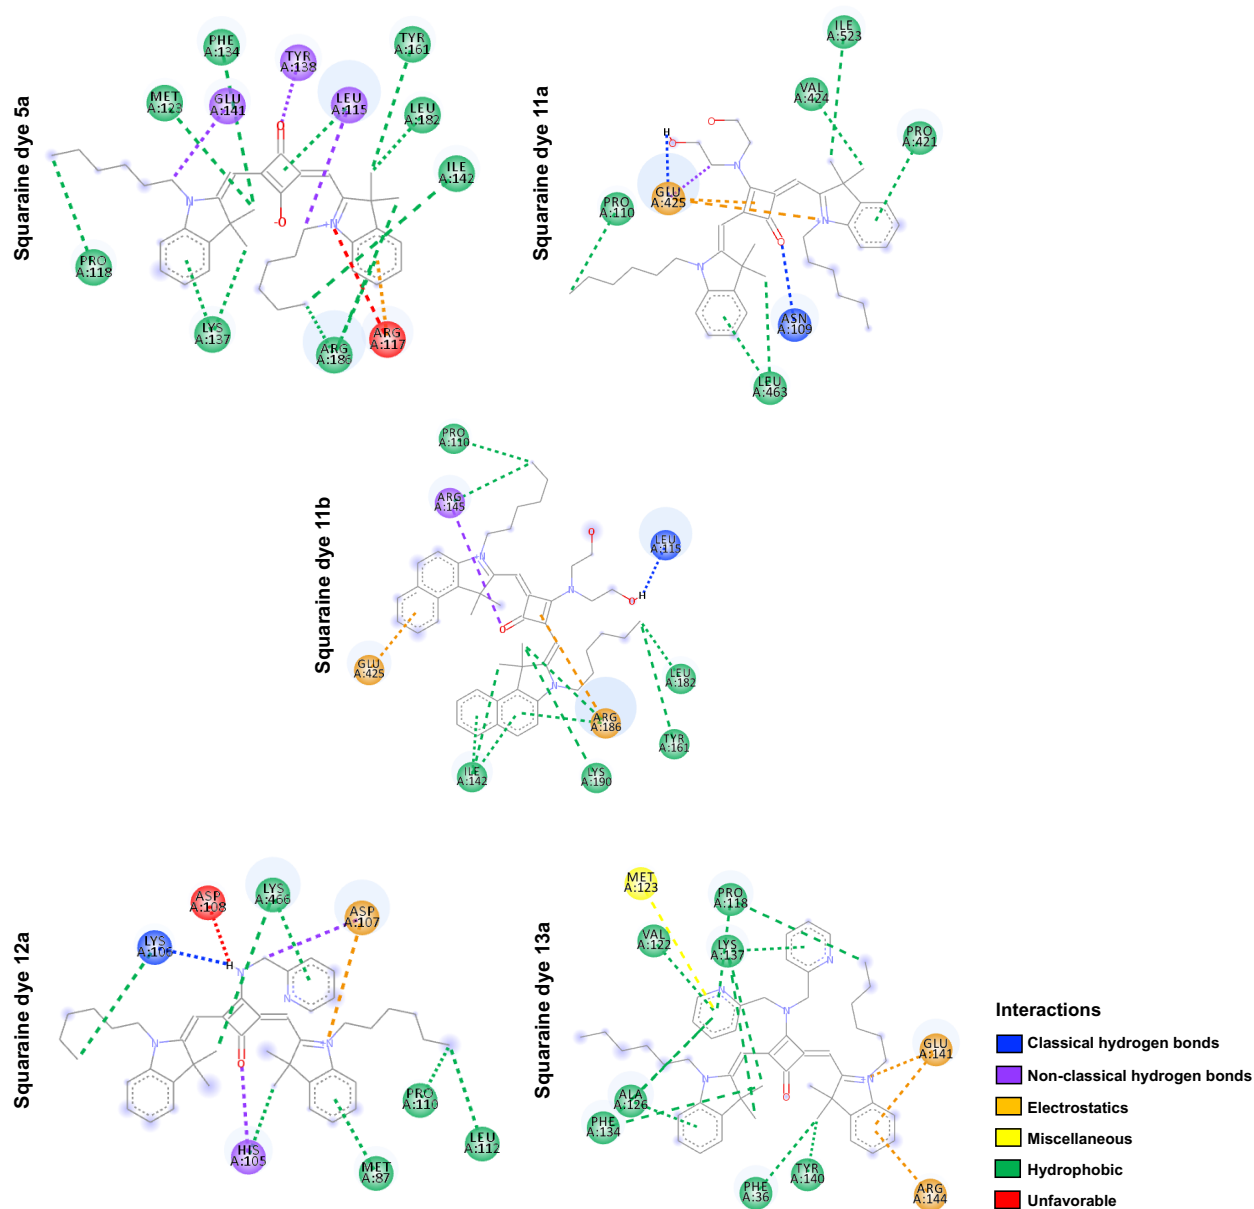

**Figure S14.** Binding modes and interactions of squaraine dyes **5a**, **11a,b**, **12a**, and **13a** with amino acid residues of human serum albumin protein.
